# Supplementary material
Source: PubMed Central journal article supplement (PMC5831505)
Supplement: NIHMS931206-supplement-3.pdf [file NIHMS931206-supplement-3.pdf]

## **Supplementary Protocol**

### **Materials**

K562 cells

HyClone RPMI 1640 Media

Fetal bovine serum (FBS), certified

Penicillin-Streptomycin, 100X solution

Phosphate buffered saline (PBS), 1X

4-thiouridine

DEPC-treated water

Qiagen RNeasy Mini kit

2-mercaptoethanol (BME)

Ethanol, 200 proof, molecular biology grade

3 M sodium acetate, pH 5.2

2,2,2-trifluoroethylamine (TFEA)

0.5 M EDTA, pH 8

Sodium periodate ( $\text{NaIO}_4$ )

0.2 mL PCR tube strips

1.5 mL microcentrifuge tubes, PCR clean

15 mL conical centrifuge tubes

1 M dithiothreitol (DTT)

22-gauge disposable needle

Luer slip syringe

Agencocurt RNAClean XP beads

Magnetic PCR tube separation rack

SMARTer Stranded Total RNA-Seq Kit - Pico Input Mammalian

PCR Thermocycler

Nanodrop spectrophotometer

Mini centrifuge for PCR strips

Benchtop microcentrifuge

1. Culture K562 cells at 37°C to approximately 50% confluence in RPMI media supplemented with 10% FBS and 1% P/S.

2. Dissolve 4-thiouridine in a minimal volume of water and add to 5 mL cultured cells at 100 mM final concentration. Agitate cells gently to evenly distribute the metabolic label. Incubate 4 hours at 37°C.

Note: Take steps to protect 4-thiouridine treated cells and RNA in all subsequent steps from light exposure.

Note: 4-thiouridine treatment time and concentration will vary by cell type and desired application. We provide an example above for K562 cells to examine relatively long RNA half-lives.

3. Transfer cells to 15 mL conical Eppendorf tube and place on ice for 1 min.

4. Pellet cells for at 4°C for 3 min at 300xg in a pre-chilled centrifuge. Aspirate cell culture medium from cell pellet.

5. Rinse pellet with ice-cold 1X PBS then pellet and aspirate as in step 4. Proceed to modified RNeasy isolation.

#### **Modified RNeasy isolation**

6. Resuspend cell pellet in 350 µl RLT buffer supplemented with 1% BME. Pass cell suspension through a 22-gauge needle 5 times to lyse the cells and transfer the mix to a 1.5 mL Eppendorf tube.

7. Add 350 µl freshly prepared 70% ethanol to the lysis mixture and mix well by inversion. Transfer 700 µl of mixture to an RNeasy spin column, and centrifuge >10,000 RPM for 15 sec. Discard flow through.

8. Add 700 µl RW1 to column and centrifuge >10,000 RPM for 15 sec. Discard flow through.

9. Add 500 µl RPE supplemented with 1% BME to column and centrifuge >10,000 RPM for 15 sec. Discard flow through.

10. Add 700 µl freshly prepared 80% ethanol to column and centrifuge at maximum speed for 2 min. Transfer column to fresh collection tube and centrifuge at maximum speed for an additional 5 min.

11. Transfer column to 1.5 ml Eppendorf tube and add 30 µl DEPC-treated water directly to column membrane. Let column stand 1 min, then centrifuge >10,000 RPM for 1 min. Assess RNA concentration by nanodrop.

#### **TimeLapse chemistry**

12. Create a master mix by combining the following on ice (15 µl total per sample, +10% to account for pipetting errors): 0.84 µl 3M sodium acetate, pH 5.2; 12.7 µl DEPC-treated water; 0.2 µl 0.5M EDTA, pH 8; 1.3 µl TFEA. Combine well by vortexing.

Note: TFEA is volatile. Pipette up and down several times prior to dispensing the reagent to ensure vapor pressure equilibration and accurate volumes.

13. Add 15  $\mu\text{l}$  above master mix to 8.7  $\mu\text{l}$  RNA sample (e.g. 2  $\mu\text{g}$  RNA in DEPC-treated water) in a 0.2 ml PCR tube strip. Combine well by flicking PCR tubes, and briefly spin to collect sample at bottom of tube.
14. Add 1.3  $\mu\text{l}$  of a 192 mM solution of  $\text{NaIO}_4$  in DEPC-treated water. Combine well by flicking PCR tubes, and briefly spin to collect sample at bottom of tube.
15. Incubate samples at 45°C for 1 h in a pre-heated PCR thermocycler with a heated lid. Cool sample to 4°C after incubation.
16. Add an equal volume (25  $\mu\text{l}$ ) of RNAClean beads to each sample and gently vortex to combine. Incubate at room temperature 10 min.  
  
Note: An aliquot of RNAClean beads should be brought to room temperature for 30 min prior to use.
17. Briefly spin to collect sample at bottom of tube, and place on a magnetic isolation rack until solution is clear (~5 min).
18. Carefully remove supernatant without disturbing bead pellet, and perform 2 washes with 200  $\mu\text{l}$  of freshly prepared 80% ethanol.
19. After removing second ethanol wash, spin to collect bead pellet at bottom of tube, and recapture beads on magnetic isolation rack for 1 min. Remove residual ethanol with a pipette and allow bead pellet to dry until just cracked (2-4 min).
20. Add 18  $\mu\text{l}$  of DEPC-treated water to dried beads. Flick samples until beads are resuspended, and allow to rehydrate for 2 min.
21. Briefly spin to collect sample at bottom of tube, and place on magnetic isolation rack until solution is clear (~2 min).
22. Carefully collect the supernatant and transfer to a fresh PCR tube strip.
23. Add 2  $\mu\text{l}$  of a freshly made 10X reducing master mix (100  $\mu\text{l}$  recipe): 10  $\mu\text{l}$  1 M Tris-HCl, pH 7.4; 10  $\mu\text{l}$  1 M DTT; 20  $\mu\text{l}$  5 M NaCl; 2  $\mu\text{l}$  0.5 M EDTA, pH 8; 58  $\mu\text{l}$  DEPC-treated water. Incubate samples at 37°C for 30 min.
24. Repeat steps 16-22 with 20  $\mu\text{l}$  of RNAClean beads, eluted into 12  $\mu\text{l}$  DEPC-treated water. Assess RNA concentration and integrity by bioanalyzer.
25. Proceed to RNA-seq library preparation using the SMARTer Stranded Total RNA-Seq Kit-Pico Input Mammalian.
